# Supplementary material for: A phenoxyl radical complex of copper(ii)
Source: Royal Society of Chemistry journal article supplement (doi:10.1039/b105186p), 2001-01-01
Supplement: b105186p.doc [file b105186p.doc]

**Supporting Information**:

**Experimental Details**

**HL**:A mixture of 3,5-di-tert-butylhydroxybenzaldehyde (2 g, 8.8 mmol), benzil (1.8 g, 8.6 mmol) and NH4OAc (5.2 g, 64 mmol) were heated to reflux for 2h in glacial AcOH (30 cm3), during which time a yellow precipitate formed. H2O (20 cm3) was added and the crude product was filtered, washed with H2O and dried by suction. The resulting solid was dissolved in CH2Cl2 and dried over anhydrous MgSO4. The solution was filtered and evaporated, producing a pale yellow powder that was recrystallised, by the diffusion of pentane into a CH2Cl2 solution, as a white solidin 75% yield (2.8 g). Elemental analysis (%): Calc. for C29H32N2O: C 82.08, H 7.55, N 6.60; Found: C 81.63, H 7.64, N 6.58. NMR (1H, 300MHz, CDCl3)/ppm): 13.2(s, 1H, N-H), 9.23(s, 1H, OH), 7.1-7.7(m, 12H, ArH), 1.47 (s, 9H, tBu), 1.62(s, 9H, tBu). mp 283C. Positive EI-MS: ion at m/z 424 {M+}.

**[CuL2] (1)**: To a solution of Cu(BF4)2·H2O (302 mg, 1.2 mmol) in distilled MeOH (5 cm3), a solution of HL (1g, 2.4 mmol) in distilled MeOH (400 cm3) was added. The resulting dark brown solution was stirred for 1h, after which time an excess of Et3N (a few drops) was added which caused the formation of a deep green solution. The solution was left to stand for 6 days in the open air and brown-purple crystals of (**1**) were obtained in 85% yield (930 mg). Elemental analysis (%): calc. for C58H62N4O2Cu·2CH3OH: C 73.96, H 7.19, N 5.75; found: C 74.22, H 6.84, N 6.06. Positive FAB-MS: ion at *m/z* 909 {M+}. Slow evaporation of a solution of **1** in CH2Cl2/DMF (9:1 v/v) afforded orange block single crystals of [CuL2]·4DMF (**1**· 4DMF).

Crystal data for **1**.4DMF: C70H90N8O6Cu, orange block, *M* = 1203.4, monoclinic, space group *C2/c*, *a* = 29.090 (2), *b* = 13.2462(9), *c* = 18.630(1) Å, ** = 112.506(1), *V* = 6631(1) Å3, *Z* = 4, *Dc* = 1.205 gcm-3, *T* = 150(2) K, *F(000)* = 2572, **(MoK) = 0.39 mm-1, 30269 reflections collected, 8328 unique (*Rint*= 0.035). The final agreement factors are *R*1 = 0.0399 for 6 303 data with F>4σ(F) and, R1 = 0.0559, *wR*2 = 0.1124 for 8 001 data.

**[ZnL2] (2)** was prepared using the similar procedure as for **1**, using Zn(BF4)2·H2O (226 mg, 0.95 mmol) in distilled MeOH (5 cm3), and LH (800 mg, 1.9 mmol) in distilled MeOH (300 cm3). After the addition of Et3N, the solution was left to stand exposed to the air and afforded a white crystalline powder in 70 % yield (650 mg). Elemental analysis (%): calc. for C58H62N4O2Zn·1.5MeOH: C 74.42, H 7.08, N 5.84; found: C 74.04, H 6.66, N 6.08. Positive FAB-MS: ion at *m/z* 910 {M+}.

**[1][BF4]**: A solution of **1** (318 mg, 0.35 mmol) in distilled CH2Cl2 (20 cm3) was added to a suspension of Ag[BF4] (68 mg, 0.35 mmol) in distilled CH2Cl2 (5 cm3) at -10C. This caused the rapid formation of a silver mirror and a dark green solution. The solution was stirred for 1 h at room temperature and then filtered. The solvent was evaporated and the resulting dark green solid was washed with distilled Et2O. The solid was then dried under vacuum to afford **1**[BF4] in 85 % yield (~ 300 mg). Dark block-shaped single crystals of [**1**][BF4]·2CH2Cl2 were grown by diffusion of hexane into a CH2Cl2 solution of [**1**][BF4]. Elemental analysis (%): calc. for C58H62N4O2CuBF4·1CH2Cl2: C 65.52, H 5.92, N 5.18; found: C 65.28, H 5.98, N 5.01. Positive FAB-MS: ion at *m/z* 910 {M+}.

**Details of the Electrochemical Experiments**

The cyclic voltammogram of each compound (1mM) in CH2Cl2 containing [NBun4][BF4] (0.2 M) as the electrolyte salt, was recorded at room temperature using a glassy carbon working electrode, a Pt wire secondary electrode, and a saturated calomel reference electrode. The potentials of the redox processes were referenced to that of the Fc+/Fc (E1/2 = 0.540 V *vs.* SCE) couple. The [FeCp*2]+/[FeCp*2] couple was used as the internal reference, where necessary to avoid overlapping redox couples; ΔE1/2 between Fc+/Fc and [FeCp*2]+/[FeCp*2], recorded under identical conditions, was 0.526 V. The cyclic voltammograms of LH, **1**, and **2** are shown in the Supplementary Information, Fig. S1.

Coulometric measurements were performed for LH, **1**, and **2** in CH2Cl2 at room temperature containing [NBun4][BF4] (0.4 M); the cell consisted a Pt/Rh gauze basket working electrode, a Pt/Rh gauze secondary electrode, and a saturated calomel reference electrode. The applied potentials (*vs*. SCE)and number of electrons transferred per mole (in parentheses) were 1.175(1.10), 0.82(0.99), and 0.86 V (0.90), respectively.

**Figure S1.** Cyclic voltammograms of LH, **1** (those of [**1**][BF4] and **1** are identical) and **2** in CH2Cl2 containing [NBun4][BF4] (0.2 M), recorded at room temperature using a glassy carbon working electrode, a Pt wire secondary electrode, and a saturated calomel reference electrode.

**Figure S2**.OTTLE spectra for the one-electron oxidation of **1** (1 mM) at 0 oC in CH2Cl2 containing [NBun4][BF4] (0.4 M), using a Pt/Rh gauze working electrode, a Pt wire secondary electrode, and a saturated calomel reference electrode. Applied potential: 0.865 V (*vs*. SCE). At room temperature in CH2Cl2: **1,** λmax 368 ( = 29 500 M-1cm-1), 501 (730), and 695 nm (590); [**1**][BF4], λmax at 410 (10 600), 484 (4 500), and 580 nm (3 700). Isobestic points were observed at 391 and (not shown) at 346 and 262 nm.

**Figure S3.** X-band EPR spectrum of **1** in CH2Cl2/toluene (9:1) at 116 K. The spectrum was successfully simulated using: *gxx* = 2.053, *gyy* = 2.047, *gzz* = 2.253; *Azz*{63,65Cu} = 164, *Axx*{63,65Cu} = *Ayy*{63,65Cu} = 29 G, *A*{14N} = 12 G.

**Figure S4**:  *vs*. T for [**1**][BF4]; the solid line represents a simulation of the experimental data, achieved with J = -6.1 cm-1, *g*Cu = 2.12, *g*rad = 2.00, plus 4% of a paramagnetic impurity with *g* = 2.2.
